# Supplementary material for: ‘Management of a spoiled identity’: systematic review of interventions to address self-stigma among people living with and affected by HIV
Source: PubMed Central journal article supplement — BMJ Glob Health. 2019 Mar 19;4(2):e001285. doi: 10.1136/bmjgh-2018-001285 (PMC6441299; doi:10.1136/bmjgh-2018-001285), 2019-03-19
Supplement: bmjgh-2018-001285supp001.pdf [file bmjgh-2018-001285supp001.pdf]

Supplementary file: Search strategies

Ovid search strategy

| No. | Terms                                                                                                                                                                                                                                                                                                                                          | Comments                  |
|-----|------------------------------------------------------------------------------------------------------------------------------------------------------------------------------------------------------------------------------------------------------------------------------------------------------------------------------------------------|---------------------------|
| 1   | (((HIV or AIDS or PLWHA or PLWH or ALHIV or WLWHA or antiretroviral or ART patient or ART) adj2 enrolled) or ((human or acquired) adj1 (immunodeficiency or immune-deficiency or immuno-deficiency))).ab,ti.                                                                                                                                   | People living with HIV    |
| 2   | (sex work or sex workers or prostitut* or brothel* or ((escort or sex) adj3 buy*) or (commercial adj3 sex*) or (sex adj3 industry)).ab,ti.                                                                                                                                                                                                     | Sex workers               |
| 3   | (heteroflexible or homosexual* or homosexualit* or gay* or MSM or men who have sex with men or bisexual).ab,ti.                                                                                                                                                                                                                                | Men who have sex with men |
| 4   | (stimulant* or polydrug* or drug* or substance).ab,ti.                                                                                                                                                                                                                                                                                         | People who use drugs      |
| 5   | (trans female or trans male or trans man or trans people or trans person or trans woman or trans girl or trans boy or trans*sexuality or transsexual* or transgender* or cross*sex or crossgender or F2M or female*to*male or gender change or gender dysphoria or gender identity or gender queer or genderqueer or gender expression).ab,ti. | Trans people              |
| 6   | (prison* or jail* or penitentiary* or bastille* or offender* or reoffend* or convict or convicts or convicted or inmate* or detainee* or cellmate* or incarcerated or incarceration or felon* or criminal*).ab,ti.                                                                                                                             | Incarcerated people       |
| 7   | or/1-6                                                                                                                                                                                                                                                                                                                                         | Combined population terms |
| 8   | ((stigma adj1 (self or internal* or auto)) or (self adj1 (perception or image))) or shame or (berger scale of stigma or berger scale) or (Serithi scale) or (Guilt and shame proneness scale) or GASP scale or HASI*P or (HIV AIDS Stigma Instrument PLWA) or guilt or (stigma adj1 scale).mp.                                                 | Outcomes                  |
| 9   | exp developing countries/                                                                                                                                                                                                                                                                                                                      | Geographic terms: LMIC    |
| 10  | (Developing adj1 Countr*).hw,ti,ab,cp.                                                                                                                                                                                                                                                                                                         |                           |
| 11  | (Africa or Central Africa or Latin America or Caribbean or West Indies or Eastern Europe or Soviet or South America or Arab or Middle East or Latin America or Central America).hw,ti,ab,cp.                                                                                                                                                   |                           |

|    |                                                                                                                                                                                                                                                                                                                                                                                                                                                                                                                                                                                                                                                                                                                                                                                                                                                                                                                                                                                                                                                                                                                                                                                                                                                                                                                                                                                                                                                                                                                                                                                                                                                                                                                                                                                                                                                                                                                                                                                                                                                                                                                                                                                                                                                                                                                                                                                                                                                                                                                                                                                                                                                                                                                                                                                                                                                                                                                                                                                                                                                                                                                                                                   |  |
|----|-------------------------------------------------------------------------------------------------------------------------------------------------------------------------------------------------------------------------------------------------------------------------------------------------------------------------------------------------------------------------------------------------------------------------------------------------------------------------------------------------------------------------------------------------------------------------------------------------------------------------------------------------------------------------------------------------------------------------------------------------------------------------------------------------------------------------------------------------------------------------------------------------------------------------------------------------------------------------------------------------------------------------------------------------------------------------------------------------------------------------------------------------------------------------------------------------------------------------------------------------------------------------------------------------------------------------------------------------------------------------------------------------------------------------------------------------------------------------------------------------------------------------------------------------------------------------------------------------------------------------------------------------------------------------------------------------------------------------------------------------------------------------------------------------------------------------------------------------------------------------------------------------------------------------------------------------------------------------------------------------------------------------------------------------------------------------------------------------------------------------------------------------------------------------------------------------------------------------------------------------------------------------------------------------------------------------------------------------------------------------------------------------------------------------------------------------------------------------------------------------------------------------------------------------------------------------------------------------------------------------------------------------------------------------------------------------------------------------------------------------------------------------------------------------------------------------------------------------------------------------------------------------------------------------------------------------------------------------------------------------------------------------------------------------------------------------------------------------------------------------------------------------------------------|--|
| 12 | <p>(Afghanistan or Albania or Algeria or Angola or Antigua or Barbuda or Argentina or Armenia or Armenian or Aruba or Azerbaijan or Bahrain or Bangladesh or Barbados or Benin or Byelarus or Byelorussian or Belarus or Belorussian or Belorussia or Belize or Bhutan or Bolivia or Bosnia or Herzegovina or Hercegovina or Botswana or Brasil or Brazil or Bulgaria or Burkina Faso or Burkina Fasso or Upper Volta or Burundi or Urundi or Cambodia or Khmer Republic or Kampuchea or Cameroon or Cameroons or Cameron or Camerons or Cape Verde or Central African Republic or Chad or Chile or China or Colombia or Comoros or Comoro Islands or Comores or Mayotte or Congo or Zaire or Costa Rica or Cote dlvoire or Ivory Coast or Croatia or Cuba or Cyprus or Czechoslovakia or Czech Republic or Slovakia or Slovak Republic or Djibouti or French Somaliland or Dominica or Dominican Republic or East Timor or East Timur or Timor Leste or Ecuador or Egypt or United Arab Republic or El Salvador or Eritrea or Estonia or Ethiopia or Fiji or Gabon or Gabonese Republic or Gambia or Gaza or Georgia Republic or Georgian Republic or Ghana or Gold Coast or Greece or Grenada or Guatemala or Guinea or Guam or Guiana or Guyana or Haiti or Honduras or Hungary or India or Maldives or Indonesia or Iran or Iraq or Isle of Man or Jamaica or Jordan or Kazakhstan or Kazakh or Kenya or Kiribati or Korea or Kosovo or Kyrgyzstan or Kirghizia or Kyrgyz Republic or Kirghiz or Kirgizstan or Lao PDR or Laos or Latvia or Lebanon or Lesotho or Basutoland or Liberia or Libya or Lithuania or Macedonia or Madagascar or Malagasy Republic or Malaysia or Malaya or Malay or Sabah or Sarawak or Malawi or Nyasaland or Mali or Malta or Marshall Islands or Mauritania or Mauritius or Agalega Islands or Mexico or Micronesia or Middle East or Moldova or Moldovia or Moldovian or Mongolia or Montenegro or Morocco or Ifni or Mozambique or Myanmar or Myanma or Burma or Namibia or Nepal or Netherlands Antilles or New Caledonia or Nicaragua or Niger or Nigeria or Northern Mariana Islands or Oman or Muscat or Pakistan or Palau or Palestine or Panama or Paraguay or Peru or Philippines or Philipines or Phillipines or Phillippines or Poland or Portugal or Puerto Rico or Romania or Rumania or Roumania or Russia or Russian or Rwanda or Ruanda or Saint Kitts or St Kitts or Nevis or Saint Lucia or St Lucia or Saint Vincent or St Vincent or Grenadines or Samoa or Samoan Islands or Navigator Island or Navigator Islands or Sao Tome or Saudi Arabia or Senegal or Serbia or Montenegro or Seychelles or Sierra Leone or Slovenia or Sri Lanka or Ceylon or Solomon Islands or Somalia or South Africa or Sudan or Suriname or Surinam or Swaziland or Syria or Tajikistan or Tadzhhikistan or Tadjikistan or Tadzhhik or Tanzania or Thailand or Togo or Togolese Republic or Tonga or Trinidad or Tobago or Tunisia or Turkey or Turkmenistan or Turkmen or Uganda or Ukraine or Uruguay or USSR or Soviet Union or Union of Soviet Socialist Republics or Uzbekistan or Uzbek or Vanuatu or New Hebrides</p> |  |
|----|-------------------------------------------------------------------------------------------------------------------------------------------------------------------------------------------------------------------------------------------------------------------------------------------------------------------------------------------------------------------------------------------------------------------------------------------------------------------------------------------------------------------------------------------------------------------------------------------------------------------------------------------------------------------------------------------------------------------------------------------------------------------------------------------------------------------------------------------------------------------------------------------------------------------------------------------------------------------------------------------------------------------------------------------------------------------------------------------------------------------------------------------------------------------------------------------------------------------------------------------------------------------------------------------------------------------------------------------------------------------------------------------------------------------------------------------------------------------------------------------------------------------------------------------------------------------------------------------------------------------------------------------------------------------------------------------------------------------------------------------------------------------------------------------------------------------------------------------------------------------------------------------------------------------------------------------------------------------------------------------------------------------------------------------------------------------------------------------------------------------------------------------------------------------------------------------------------------------------------------------------------------------------------------------------------------------------------------------------------------------------------------------------------------------------------------------------------------------------------------------------------------------------------------------------------------------------------------------------------------------------------------------------------------------------------------------------------------------------------------------------------------------------------------------------------------------------------------------------------------------------------------------------------------------------------------------------------------------------------------------------------------------------------------------------------------------------------------------------------------------------------------------------------------------|--|

|    |                                                                                                                         |                                            |
|----|-------------------------------------------------------------------------------------------------------------------------|--------------------------------------------|
|    | or Venezuela or Vietnam or Viet Nam or West Bank or Yemen or Yugoslavia or Zambia or Zimbabwe or Rhodesia).hw,ti,ab,cp. |                                            |
| 13 | (low adj3 middle adj1 countr*).ti,ab.                                                                                   |                                            |
| 14 | (lmic or lmics or third world or lami countr*).ti,ab.                                                                   |                                            |
| 15 | transitional countr*.ti,ab.                                                                                             |                                            |
| 16 | or/9-15                                                                                                                 | Combined LMIC terms                        |
| 17 | 7 and 8 and 16                                                                                                          | Population, Outcomes, and Geographic terms |

CENTRAL Search Strategy

| No. | Terms                                                                                                                                                                                                                                                                                                                                          | Comments                  |
|-----|------------------------------------------------------------------------------------------------------------------------------------------------------------------------------------------------------------------------------------------------------------------------------------------------------------------------------------------------|---------------------------|
| 1   | (((HIV or AIDS or PLWHA or PLWH or ALHIV or WLWHA or antiretroviral or ART patient or ART) adj2 enrolled) or ((human or acquired) adj1 (immunodeficiency or immune-deficiency or immuno-deficiency))).ab,ti.                                                                                                                                   | People living with HIV    |
| 2   | (sex work or sex workers or prostitut* or brothel* or ((escort or sex) adj3 buy*) or (commercial adj3 sex*) or (sex adj3 industry)).ab,ti.                                                                                                                                                                                                     | Sex workers               |
| 3   | (heteroflexible or homosexual* or homosexualit* or gay* or MSM or men who have sex with men or bisexual).ab,ti.                                                                                                                                                                                                                                | Men who have sex with men |
| 4   | (stimulant* or polydrug* or drug* or substance).ab,ti.                                                                                                                                                                                                                                                                                         | People who use drugs      |
| 5   | (trans female or trans male or trans man or trans people or trans person or trans woman or trans girl or trans boy or trans*sexuality or transsexual* or transgender* or cross*sex or crossgender or F2M or female*to*male or gender change or gender dysphoria or gender identity or gender queer or genderqueer or gender expression).ab,ti. | Trans people              |
| 6   | (prison* or jail* or penitentiary* or bastille* or offender* or reoffend* or convict or convicts or convicted or inmate* or detainee* or cellmate* or incarcerated or incarceration or felon* or criminal*).ab,ti.                                                                                                                             | Incarcerated people       |
| 7   | or/1-6                                                                                                                                                                                                                                                                                                                                         | Combined population terms |
| 8   | ((stigma adj1 (self or internal* or auto)) or (self adj1 (perception or image)) or shame or (berger scale of stigma or berger scale) or Serithi scale or (Guilt and shame proneness scale) or GASP scale or HASI*P or HIV AIDS Stigma Instrument PLWA or guilt or (stigma adj1 scale)).mp.                                                     | Outcomes                  |
| 9   | exp developing countries/                                                                                                                                                                                                                                                                                                                      | Geographic terms: LMIC    |
| 10  | (Developing adj1 Countr*).hw,ti,ab,cp.                                                                                                                                                                                                                                                                                                         |                           |
| 11  | (Africa or Central Africa or Latin America or Caribbean or West Indies or Eastern Europe or Soviet or South America or Arab or Middle East or Latin America or Central America).hw,ti,ab,cp.                                                                                                                                                   |                           |

|    |                                                                                                                                                                                                                                                                                                                                                                                                                                                                                                                                                                                                                                                                                                                                                                                                                                                                                                                                                                                                                                                                                                                                                                                                                                                                                                                                                                                                                                                                                                                                                                                                                                                                                                                                                                                                                                                                                                                                                                                                                                                                                                                                                                                                                                                                                                                                                                                                                                                                                                                                                                                                                                                                                                                                                                                                                                                                                                                                                                                                                                                                                                                                                                                                                                                                                         |  |
|----|-----------------------------------------------------------------------------------------------------------------------------------------------------------------------------------------------------------------------------------------------------------------------------------------------------------------------------------------------------------------------------------------------------------------------------------------------------------------------------------------------------------------------------------------------------------------------------------------------------------------------------------------------------------------------------------------------------------------------------------------------------------------------------------------------------------------------------------------------------------------------------------------------------------------------------------------------------------------------------------------------------------------------------------------------------------------------------------------------------------------------------------------------------------------------------------------------------------------------------------------------------------------------------------------------------------------------------------------------------------------------------------------------------------------------------------------------------------------------------------------------------------------------------------------------------------------------------------------------------------------------------------------------------------------------------------------------------------------------------------------------------------------------------------------------------------------------------------------------------------------------------------------------------------------------------------------------------------------------------------------------------------------------------------------------------------------------------------------------------------------------------------------------------------------------------------------------------------------------------------------------------------------------------------------------------------------------------------------------------------------------------------------------------------------------------------------------------------------------------------------------------------------------------------------------------------------------------------------------------------------------------------------------------------------------------------------------------------------------------------------------------------------------------------------------------------------------------------------------------------------------------------------------------------------------------------------------------------------------------------------------------------------------------------------------------------------------------------------------------------------------------------------------------------------------------------------------------------------------------------------------------------------------------------------|--|
| 12 | <p>(Afghanistan or Albania or Algeria or Angola or Antigua or Barbuda or Argentina or Armenia or Armenian or Aruba or Azerbaijan or Bahrain or Bangladesh or Barbados or Benin or Byelarus or Byelorussian or Belarus or Belorussian or Belorussia or Belize or Bhutan or Bolivia or Bosnia or Herzegovina or Hercegovina or Botswana or Brasil or Brazil or Bulgaria or Burkina Faso or Burkina Fasso or Upper Volta or Burundi or Urundi or Cambodia or Khmer Republic or Kampuchea or Cameroon or Camerouns or Cameron or Camerons or Cape Verde or Central African Republic or Chad or Chile or China or Colombia or Comoros or Comoro Islands or Comores or Mayotte or Congo or Zaire or Costa Rica or Cote dlvoire or Ivory Coast or Croatia or Cuba or Cyprus or Czechoslovakia or Czech Republic or Slovakia or Slovak Republic or Djibouti or French Somaliland or Dominica or Dominican Republic or East Timor or East Timur or Timor Leste or Ecuador or Egypt or United Arab Republic or El Salvador or Eritrea or Estonia or Ethiopia or Fiji or Gabon or Gabonese Republic or Gambia or Gaza or Georgia Republic or Georgian Republic or Ghana or Gold Coast or Greece or Grenada or Guatemala or Guinea or Guam or Guiana or Guyana or Haiti or Honduras or Hungary or India or Maldives or Indonesia or Iran or Iraq or Isle of Man or Jamaica or Jordan or Kazakhstan or Kazakh or Kenya or Kiribati or Korea or Kosovo or Kyrgyzstan or Kirghizia or Kyrgyz Republic or Kirghiz or Kirgizstan or Lao PDR or Laos or Latvia or Lebanon or Lesotho or Basutoland or Liberia or Libya or Lithuania or Macedonia or Madagascar or Malagasy Republic or Malaysia or Malaya or Malay or Sabah or Sarawak or Malawi or Nyasaland or Mali or Malta or Marshall Islands or Mauritania or Mauritius or Agalega Islands or Mexico or Micronesia or Middle East or Moldova or Moldovia or Moldovian or Mongolia or Montenegro or Morocco or Ifni or Mozambique or Myanmar or Myanma or Burma or Namibia or Nepal or Netherlands Antilles or New Caledonia or Nicaragua or Niger or Nigeria or Northern Mariana Islands or Oman or Muscat or Pakistan or Palau or Palestine or Panama or Paraguay or Peru or Philippines or Philipines or Phillipines or Phillippines or Poland or Portugal or Puerto Rico or Romania or Rumania or Roumania or Russia or Russian or Rwanda or Ruanda or Saint Kitts or St Kitts or Nevis or Saint Lucia or St Lucia or Saint Vincent or St Vincent or Grenadines or Samoa or Samoan Islands or Navigator Island or Navigator Islands or Sao Tome or Saudi Arabia or Senegal or Serbia or Montenegro or Seychelles or Sierra Leone or Slovenia or Sri Lanka or Ceylon or Solomon Islands or Somalia or South Africa or Sudan or Suriname or Surinam or Swaziland or Syria or Tajikistan or Tadjhikistan or Tadjikistan or Tadjhik or Tanzania or Thailand or Togo or Togolese Republic or Tonga or Trinidad or Tobago or Tunisia or Turkey or Turkmenistan or Turkmen or Uganda or Ukraine or Uruguay or USSR or Soviet Union or Union of Soviet Socialist Republics or Uzbekistan or Uzbek or Vanuatu or New Hebrides or Venezuela or Vietnam or Viet Nam or West Bank or Yemen or Yugoslavia or Zambia or Zimbabwe or Rhodesia).hw,ti,ab,cp.</p> |  |
| 13 | (low adj3 middle adj1 countr*).ti,ab.                                                                                                                                                                                                                                                                                                                                                                                                                                                                                                                                                                                                                                                                                                                                                                                                                                                                                                                                                                                                                                                                                                                                                                                                                                                                                                                                                                                                                                                                                                                                                                                                                                                                                                                                                                                                                                                                                                                                                                                                                                                                                                                                                                                                                                                                                                                                                                                                                                                                                                                                                                                                                                                                                                                                                                                                                                                                                                                                                                                                                                                                                                                                                                                                                                                   |  |

|    |                                                       |                                            |
|----|-------------------------------------------------------|--------------------------------------------|
| 14 | (lmic or lmics or third world or lami countr*).ti,ab. |                                            |
| 15 | transitional countr*.ti,ab.                           |                                            |
| 16 | or/8-15                                               | Combined LMIC terms                        |
| 17 | 7 and 8 and 16                                        | Population, Outcomes, and Geographic terms |

### Global Health Search Strategy

| No | Terms                                                                                                                                                                                                                                                                                                                                                                               | Field                    | Comments                  |
|----|-------------------------------------------------------------------------------------------------------------------------------------------------------------------------------------------------------------------------------------------------------------------------------------------------------------------------------------------------------------------------------------|--------------------------|---------------------------|
| 1  | (HIV or human immunodeficiency virus or AIDS or acquired immunodeficiency syndrome* or people living with hiv or people living with aids or people living with hiv and aids or PLWHA or PLWH or adolescents living with HIV or ALHIV or women living with hiv or women living with aids or women living with hiv and aids or WLHWA or WLWH or antiretroviral or ART or ART patient) | AB abstract and TI Title | People living with HIV    |
| 2  | (sex worker* or sex work or prostitut* or brothel* or escort* or commercial sex or sex commerical or sex industry or industry sex)                                                                                                                                                                                                                                                  | AB abstract and TI Title | Sex workers               |
| 3  | (heteroflexible or homosexual* or homosexualit* or gay* or MSM or men who have sex with men or bisexual)                                                                                                                                                                                                                                                                            | AB abstract and TI Title | Men who have sex with men |
| 4  | (stimulant* or polydrug* or drug* or substance)                                                                                                                                                                                                                                                                                                                                     | AB abstract and TI Title | People who use drugs      |
| 5  | (trans female or trans male or trans man or trans people or trans person or trans woman or trans girl or trans boy or trans*sexuality or transsexual* or transgender* or cross*sex or crossgender or F2M or female*to*male or gender change or gender dysphoria or gender identity or gender queer or genderqueer or gender expression)                                             | AB abstract and TI Title | Trans people              |
| 6  | (prison* or jail* or penitentiary* or bastille* or offender* or reoffend* or convict or convicts or convicted or inmate* or detainee* or cellmate* or incarcerated or incarceration or felon* or criminal*)                                                                                                                                                                         | AB abstract and TI Title | Incarcerated people       |
| 7  | S1 OR S2 OR S3 OR S4 OR S5 OR S6                                                                                                                                                                                                                                                                                                                                                    | --                       |                           |

|    |                                                                                                                                                                                                                                                                                                                                                                                          |        |            |
|----|------------------------------------------------------------------------------------------------------------------------------------------------------------------------------------------------------------------------------------------------------------------------------------------------------------------------------------------------------------------------------------------|--------|------------|
| 8  | (stigma or self stigma or stigma self or internal stigma or stigma internal or auto stigma or stigma auto or self perception or perception self or self image or image self or shame or berger scale of stigma or berger scale or Serithi scale or Guilt and shame proneness scale or GASP scale or HASI*P or HIV AIDS Stigma Instrument PLWA or guilt or stigma scale or scale stigma ) | TX All | Outcomes   |
| 9  | (Developing countries)                                                                                                                                                                                                                                                                                                                                                                   | TX All | LMIC terms |
| 10 | (Africa or Central Africa or Latin America or Caribbean or West Indies or Eastern Europe or Soviet or South America or Arab or Middle East or Latin America or Central America)                                                                                                                                                                                                          | TX All |            |

|    |                                                                                                                                                                                                                                                                                                                                                                                                                                                                                                                                                                                                                                                                                                                                                                                                                                                                                                                                                                                                                                                                                                                                                                                                                                                                                                                                                                                                                                                                                                                                                                                                                                                                                                                                                                                                                                                                                                                                                                                                                                                                                                                                                                                                                                                                                                                                                                                                                                                                                                                                                                                                                                                                                                                                                                                                                                                                                                               |        |  |
|----|---------------------------------------------------------------------------------------------------------------------------------------------------------------------------------------------------------------------------------------------------------------------------------------------------------------------------------------------------------------------------------------------------------------------------------------------------------------------------------------------------------------------------------------------------------------------------------------------------------------------------------------------------------------------------------------------------------------------------------------------------------------------------------------------------------------------------------------------------------------------------------------------------------------------------------------------------------------------------------------------------------------------------------------------------------------------------------------------------------------------------------------------------------------------------------------------------------------------------------------------------------------------------------------------------------------------------------------------------------------------------------------------------------------------------------------------------------------------------------------------------------------------------------------------------------------------------------------------------------------------------------------------------------------------------------------------------------------------------------------------------------------------------------------------------------------------------------------------------------------------------------------------------------------------------------------------------------------------------------------------------------------------------------------------------------------------------------------------------------------------------------------------------------------------------------------------------------------------------------------------------------------------------------------------------------------------------------------------------------------------------------------------------------------------------------------------------------------------------------------------------------------------------------------------------------------------------------------------------------------------------------------------------------------------------------------------------------------------------------------------------------------------------------------------------------------------------------------------------------------------------------------------------------------|--------|--|
| 11 | <p>(Afghanistan or Albania or Algeria or Angola or Antigua or Barbuda or Argentina or Armenia or Armenian or Aruba or Azerbaijan or Bahrain or Bangladesh or Barbados or Benin or Byelarus or Byelorussian or Belarus or Belorussian or Belorussia or Belize or Bhutan or Bolivia or Bosnia or Herzegovina or Hercegovina or Botswana or Brasil or Brazil or Bulgaria or Burkina Faso or Burkina Fasso or Upper Volta or Burundi or Urundi or Cambodia or Khmer Republic or Kampuchea or Cameroon or Cameroons or Cameron or Camerons or Cape Verde or Central African Republic or Chad or Chile or China or Colombia or Comoros or Comoro Islands or Comores or Mayotte or Congo or Zaire or Costa Rica or Cote dlvoire or Ivory Coast or Croatia or Cuba or Cyprus or Czechoslovakia or Czech Republic or Slovakia or Slovak Republic or Djibouti or French Somaliland or Dominica or Dominican Republic or East Timor or East Timur or Timor Leste or Ecuador or Egypt or United Arab Republic or El Salvador or Eritrea or Estonia or Ethiopia or Fiji or Gabon or Gabonese Republic or Gambia or Gaza or Georgia Republic or Georgian Republic or Ghana or Gold Coast or Greece or Grenada or Guatemala or Guinea or Guam or Guiana or Guyana or Haiti or Honduras or Hungary or India or Maldives or Indonesia or Iran or Iraq or Isle of Man or Jamaica or Jordan or Kazakhstan or Kazakh or Kenya or Kiribati or Korea or Kosovo or Kyrgyzstan or Kirghizia or Kyrgyz Republic or Kirghiz or Kirgizstan or Lao PDR or Laos or Latvia or Lebanon or Lesotho or Basutoland or Liberia or Libya or Lithuania or Macedonia or Madagascar or Malagasy Republic or Malaysia or Malaya or Malay or Sabah or Sarawak or Malawi or Nyasaland or Mali or Malta or Marshall Islands or Mauritania or Mauritius or Agalega Islands or Mexico or Micronesia or Middle East or Moldova or Moldovia or Moldovian or Mongolia or Montenegro or Morocco or Ifni or Mozambique or Myanmar or Myanma or Burma or Namibia or Nepal or Netherlands Antilles or New Caledonia or Nicaragua or Niger or Nigeria or Northern Mariana Islands or Oman or Muscat or Pakistan or Palau or Palestine or Panama or Paraguay or Peru or Philippines or Philipines or Phillipines or Phillippines or Poland or Portugal or Puerto Rico or Romania or Rumania or Roumania or Russia or Russian or Rwanda or Ruanda or Saint Kitts or St Kitts or Nevis or Saint Lucia or St Lucia or Saint Vincent or St Vincent or Grenadines or Samoa or Samoan Islands or Navigator Island or Navigator Islands or Sao Tome or Saudi Arabia or Senegal or Serbia or Montenegro or Seychelles or Sierra Leone or Slovenia or Sri Lanka or Ceylon or Solomon Islands or Somalia or South Africa or Sudan or Suriname or Surinam or Swaziland or Syria or Tajikistan or Tadzhikistan or Tadjikistan or Tadzhik or Tanzania or Thailand or Togo or</p> | TX All |  |
|----|---------------------------------------------------------------------------------------------------------------------------------------------------------------------------------------------------------------------------------------------------------------------------------------------------------------------------------------------------------------------------------------------------------------------------------------------------------------------------------------------------------------------------------------------------------------------------------------------------------------------------------------------------------------------------------------------------------------------------------------------------------------------------------------------------------------------------------------------------------------------------------------------------------------------------------------------------------------------------------------------------------------------------------------------------------------------------------------------------------------------------------------------------------------------------------------------------------------------------------------------------------------------------------------------------------------------------------------------------------------------------------------------------------------------------------------------------------------------------------------------------------------------------------------------------------------------------------------------------------------------------------------------------------------------------------------------------------------------------------------------------------------------------------------------------------------------------------------------------------------------------------------------------------------------------------------------------------------------------------------------------------------------------------------------------------------------------------------------------------------------------------------------------------------------------------------------------------------------------------------------------------------------------------------------------------------------------------------------------------------------------------------------------------------------------------------------------------------------------------------------------------------------------------------------------------------------------------------------------------------------------------------------------------------------------------------------------------------------------------------------------------------------------------------------------------------------------------------------------------------------------------------------------------------|--------|--|

|    |                                                                                                                                                                                                                                                                                                                                                              |        |                                            |
|----|--------------------------------------------------------------------------------------------------------------------------------------------------------------------------------------------------------------------------------------------------------------------------------------------------------------------------------------------------------------|--------|--------------------------------------------|
|    | Togolese Republic or Tonga or Trinidad or Tobago or Tunisia or Turkey or Turkmenistan or Turkmen or Uganda or Ukraine or Uruguay or USSR or Soviet Union or Union of Soviet Socialist Republics or Uzbekistan or Uzbek or Vanuatu or New Hebrides or Venezuela or Vietnam or Viet Nam or West Bank or Yemen or Yugoslavia or Zambia or Zimbabwe or Rhodesia) |        |                                            |
| 12 | (low and middle income countr* or LMIC or lmics or third world or lami countr* low income countr* or middle income countr*)                                                                                                                                                                                                                                  | TX All |                                            |
| 13 | S9 OR S10 OR S11 OR S12                                                                                                                                                                                                                                                                                                                                      | --     | Combined LMIC terms                        |
| 14 | S7 AND S8 AND S13                                                                                                                                                                                                                                                                                                                                            |        | Population, Outcomes, and Geographic terms |

CINAHL Search Strategy

| No | Terms                                                                                                                                                                                                                                                                                                                                                                                    | Field  | Comments                  |
|----|------------------------------------------------------------------------------------------------------------------------------------------------------------------------------------------------------------------------------------------------------------------------------------------------------------------------------------------------------------------------------------------|--------|---------------------------|
| 1  | (HIV or human immunodeficiency virus or AIDS or acquired immunodeficiency syndrome* or people living with hiv or people living with aids or people living with hiv and aids or PLWHA or PLWH or adolescents living with HIV or ALHIV or women living with hiv or women living with aids or women living with hiv and aids or WLHWA or WLWH or antiretroviral or ART or ART patient)      | TX All | People living with HIV    |
| 2  | (sex worker* or sex work or prostitut* or brothel* or escort* or commercial sex or sex commerical or sex industry or industry sex)                                                                                                                                                                                                                                                       | TX All | Sex workers               |
| 3  | (heteroflexible or homosexual* or homosexualit* or gay* or MSM or men who have sex with men or bisexual)                                                                                                                                                                                                                                                                                 | TX All | Men who have sex with men |
| 4  | (stimulant* or polydrug* or drug* or substance)                                                                                                                                                                                                                                                                                                                                          | TX All | People who use drugs      |
| 5  | (trans female or trans male or trans man or trans people or trans person or trans woman or trans girl or trans boy or trans*sexuality or transsexual* or transgender* or cross*sex or crossgender or F2M or female*to*male or gender change or gender dysphoria or gender identity or gender queer or genderqueer or gender expression)                                                  | TX All | Trans people              |
| 6  | (prison* or jail* or penitentiary* or bastille* or offender* or reoffend* or convict or convicts or convicted or inmate* or detainee* or cellmate* or incarcerated or incarceration or felon* or criminal*)                                                                                                                                                                              | TX All | Incarcerated people       |
| 7  | S1 OR S2 OR S3 OR S4 OR S5 OR S6                                                                                                                                                                                                                                                                                                                                                         | --     |                           |
| 8  | (stigma or self stigma or stigma self or internal stigma or stigma internal or auto stigma or stigma auto or self perception or perception self or self image or image self or shame or berger scale of stigma or berger scale or Serithi scale or Guilt and shame proneness scale or GASP scale or HASI*P or HIV AIDS Stigma Instrument PLWA or guilt or stigma scale or scale stigma ) | TX All | Outcomes                  |
| 9  | (Developing countries)                                                                                                                                                                                                                                                                                                                                                                   | TX All | LMIC terms                |
| 10 | (Africa or Central Africa or Latin America or Caribbean or West Indies or Eastern Europe or Soviet or South America or Arab or Middle East or Latin America or Central America)                                                                                                                                                                                                          | TX All |                           |

|    |                                                                                                                                                                                                                                                                                                                                                                                                                                                                                                                                                                                                                                                                                                                                                                                                                                                                                                                                                                                                                                                                                                                                                                                                                                                                                                                                                                                                                                                                                                                                                                                                                                                                                                                                                                                                                                                                                                                                                                                                                                                                                                                                                                                                                                                                                                                                                                                                                                                                                                                                                                                                                                                                                                                                                                                                                                                     |        |  |
|----|-----------------------------------------------------------------------------------------------------------------------------------------------------------------------------------------------------------------------------------------------------------------------------------------------------------------------------------------------------------------------------------------------------------------------------------------------------------------------------------------------------------------------------------------------------------------------------------------------------------------------------------------------------------------------------------------------------------------------------------------------------------------------------------------------------------------------------------------------------------------------------------------------------------------------------------------------------------------------------------------------------------------------------------------------------------------------------------------------------------------------------------------------------------------------------------------------------------------------------------------------------------------------------------------------------------------------------------------------------------------------------------------------------------------------------------------------------------------------------------------------------------------------------------------------------------------------------------------------------------------------------------------------------------------------------------------------------------------------------------------------------------------------------------------------------------------------------------------------------------------------------------------------------------------------------------------------------------------------------------------------------------------------------------------------------------------------------------------------------------------------------------------------------------------------------------------------------------------------------------------------------------------------------------------------------------------------------------------------------------------------------------------------------------------------------------------------------------------------------------------------------------------------------------------------------------------------------------------------------------------------------------------------------------------------------------------------------------------------------------------------------------------------------------------------------------------------------------------------------|--------|--|
| 11 | <p>(Afghanistan or Albania or Algeria or Angola or Antigua or Barbuda or Argentina or Armenia or Armenian or Aruba or Azerbaijan or Bahrain or Bangladesh or Barbados or Benin or Byelarus or Byelorussian or Belarus or Belorussian or Belorussia or Belize or Bhutan or Bolivia or Bosnia or Herzegovina or Hercegovina or Botswana or Brasil or Brazil or Bulgaria or Burkina Faso or Burkina Fasso or Upper Volta or Burundi or Urundi or Cambodia or Khmer Republic or Kampuchea or Cameroon or Cameroons or Cameron or Camerons or Cape Verde or Central African Republic or Chad or Chile or China or Colombia or Comoros or Comoro Islands or Comores or Mayotte or Congo or Zaire or Costa Rica or Cote dlvoire or Ivory Coast or Croatia or Cuba or Cyprus or Czechoslovakia or Czech Republic or Slovakia or Slovak Republic or Djibouti or French Somaliland or Dominica or Dominican Republic or East Timor or East Timur or Timor Leste or Ecuador or Egypt or United Arab Republic or El Salvador or Eritrea or Estonia or Ethiopia or Fiji or Gabon or Gabonese Republic or Gambia or Gaza or Georgia Republic or Georgian Republic or Ghana or Gold Coast or Greece or Grenada or Guatemala or Guinea or Guam or Guiana or Guyana or Haiti or Honduras or Hungary or India or Maldives or Indonesia or Iran or Iraq or Isle of Man or Jamaica or Jordan or Kazakhstan or Kazakh or Kenya or Kiribati or Korea or Kosovo or Kyrgyzstan or Kirghizia or Kyrgyz Republic or Kirghiz or Kirgizstan or Lao PDR or Laos or Latvia or Lebanon or Lesotho or Basutoland or Liberia or Libya or Lithuania or Macedonia or Madagascar or Malagasy Republic or Malaysia or Malaya or Malay or Sabah or Sarawak or Malawi or Nyasaland or Mali or Malta or Marshall Islands or Mauritania or Mauritius or Agalega Islands or Mexico or Micronesia or Middle East or Moldova or Moldovia or Moldovian or Mongolia or Montenegro or Morocco or Ifni or Mozambique or Myanmar or Myanma or Burma or Namibia or Nepal or Netherlands Antilles or New Caledonia or Nicaragua or Niger or Nigeria or Northern Mariana Islands or Oman or Muscat or Pakistan or Palau or Palestine or Panama or Paraguay or Peru or Philippines or Philipines or Phillipines or Phillippines or Poland or Portugal or Puerto Rico or Romania or Rumania or Roumania or Russia or Russian or Rwanda or Ruanda or Saint Kitts or St Kitts or Nevis or Saint Lucia or St Lucia or Saint Vincent or St Vincent or Grenadines or Samoa or Samoan Islands or Navigator Island or Navigator Islands or Sao Tome or Saudi Arabia or Senegal or Serbia or Montenegro or Seychelles or Sierra Leone or Slovenia or Sri Lanka or Ceylon or Solomon Islands or Somalia or South Africa or Sudan or Suriname or Surinam or Swaziland or Syria or Tajikistan or Tadzhikistan or</p> | TX All |  |
|----|-----------------------------------------------------------------------------------------------------------------------------------------------------------------------------------------------------------------------------------------------------------------------------------------------------------------------------------------------------------------------------------------------------------------------------------------------------------------------------------------------------------------------------------------------------------------------------------------------------------------------------------------------------------------------------------------------------------------------------------------------------------------------------------------------------------------------------------------------------------------------------------------------------------------------------------------------------------------------------------------------------------------------------------------------------------------------------------------------------------------------------------------------------------------------------------------------------------------------------------------------------------------------------------------------------------------------------------------------------------------------------------------------------------------------------------------------------------------------------------------------------------------------------------------------------------------------------------------------------------------------------------------------------------------------------------------------------------------------------------------------------------------------------------------------------------------------------------------------------------------------------------------------------------------------------------------------------------------------------------------------------------------------------------------------------------------------------------------------------------------------------------------------------------------------------------------------------------------------------------------------------------------------------------------------------------------------------------------------------------------------------------------------------------------------------------------------------------------------------------------------------------------------------------------------------------------------------------------------------------------------------------------------------------------------------------------------------------------------------------------------------------------------------------------------------------------------------------------------------|--------|--|

|    |                                                                                                                                                                                                                                                                                                                                                                                                                        |        |                                            |
|----|------------------------------------------------------------------------------------------------------------------------------------------------------------------------------------------------------------------------------------------------------------------------------------------------------------------------------------------------------------------------------------------------------------------------|--------|--------------------------------------------|
|    | Tadjikistan or TadzhiK or Tanzania or Thailand or Togo or Togolese Republic or Tonga or Trinidad or Tobago or Tunisia or Turkey or Turkmenistan or Turkmen or Uganda or Ukraine or Uruguay or USSR or Soviet Union or Union of Soviet Socialist Republics or Uzbekistan or Uzbek or Vanuatu or New Hebrides or Venezuela or Vietnam or Viet Nam or West Bank or Yemen or Yugoslavia or Zambia or Zimbabwe or Rhodesia) |        |                                            |
| 12 | (low and middle income countr* or LMIC or lmics or third world or lami countr* low income countr* or middle income countr*)                                                                                                                                                                                                                                                                                            | TX All |                                            |
| 13 | S9 OR S10 OR S11 OR S12                                                                                                                                                                                                                                                                                                                                                                                                | --     | Combined LMIC terms                        |
| 14 | S7 AND S8 AND S13                                                                                                                                                                                                                                                                                                                                                                                                      |        | Population, Outcomes, and Geographic terms |

## WHO Afro Search Strategy

| No. | Terms                             | Field         |
|-----|-----------------------------------|---------------|
| 1   | Self stigma                       | All materials |
| 2   | Stigma                            | All materials |
| 3   | Internal stigma                   | All materials |
| 4   | Auto stigma                       | All materials |
| 5   | Shame                             | All materials |
| 6   | Berger scale of stigma            | All materials |
| 7   | Serithi scale                     | All materials |
| 8   | Guilt and shame proneness scale   | All materials |
| 9   | GASP scale                        | All materials |
| 10  | "HASI-P"                          | All materials |
| 11  | "HIV AIDS Stigma Instrument PLWA" | All materials |
| 12  | Guilt                             | All materials |
| 13  | Stigma scale                      | All materials |

## Grey literature websites searched

|                                                                                                                                                                                                                                                                  |
|------------------------------------------------------------------------------------------------------------------------------------------------------------------------------------------------------------------------------------------------------------------|
| UNAIDS<br>via <a href="http://www.unaids.org">www.unaids.org</a>                                                                                                                                                                                                 |
| United Nations Development Programme<br>via <a href="http://www.undp.org/">http://www.undp.org/</a>                                                                                                                                                              |
| Global Commission on HIV and the law<br>via <a href="http://www.hivlawcommission.org/">http://www.hivlawcommission.org/</a>                                                                                                                                      |
| OHCRR<br>via <a href="http://www.ohchr.org">www.ohchr.org</a>                                                                                                                                                                                                    |
| UNAIDS Final Report on Mapping of tools on HIV-related stigma and discrimination in healthcare settings<br>( <a href="https://drive.google.com/file/d/0By4gqCSgX1UcaEhjYWxYVnMzMFE/view">https://drive.google.com/file/d/0By4gqCSgX1UcaEhjYWxYVnMzMFE/view</a> ) |

|                                                                                                                                                                           |
|---------------------------------------------------------------------------------------------------------------------------------------------------------------------------|
| AIDS Action Europe<br>via <a href="http://www.aidsactioneurope.org/en/clearinghouse">http://www.aidsactioneurope.org/en/clearinghouse</a>                                 |
| USAID Development Experience Clearinghouse<br>via <a href="https://dec.usaid.gov/dec/home/Default.aspx">https://dec.usaid.gov/dec/home/Default.aspx</a>                   |
| UNESCO HIV and AIDS Education Clearinghouse<br>via <a href="http://hivhealthclearinghouse.unesco.org/">http://hivhealthclearinghouse.unesco.org/</a>                      |
| United Nations treaty collection<br>via <a href="https://treaties.un.org/">https://treaties.un.org/</a>                                                                   |
| Max Planck Encyclopaedia of public international law<br>via <a href="http://opil.ouplaw.com/home/EPIL">http://opil.ouplaw.com/home/EPIL</a>                               |
| Open Society Foundation<br>via <a href="https://www.opensocietyfoundations.org/topics/law-and-health">https://www.opensocietyfoundations.org/topics/law-and-health</a>    |
| Amnesty International<br>via <a href="https://www.amnesty.org/en/">https://www.amnesty.org/en/</a>                                                                        |
| Human Rights Watch<br>via <a href="https://www.hrw.org/">https://www.hrw.org/</a>                                                                                         |
| Association for Women's Rights in Development (AWID)<br>via <a href="http://www.awid.org/publications">www.awid.org/publications</a>                                      |
| International Center for Research on Women<br>via <a href="http://www.icrw.org/research-programs/">http://www.icrw.org/research-programs/</a>                             |
| Inter-american Human Rights System<br>via <a href="http://www.ijrcenter.org/regional/inter-american-system/">http://www.ijrcenter.org/regional/inter-american-system/</a> |
| African Human Rights System<br>via <a href="http://www.ijrcenter.org/regional/african/">http://www.ijrcenter.org/regional/african/</a>                                    |
